# Supplementary material for: Modulation of titania nanoflower arrays transformed from titanate nanowire arrays to boost photocatalytic Cr(vi) detoxification
Source: Royal Society of Chemistry journal article supplement (doi:10.1039/d2nj03748c), 2022-01-01
Supplement: d2nj03748c1.pdf [file d2nj03748c1.pdf]

## Electronic Supplementary Information

for

### Modulation of titania nanoflower arrays transformed from titanate nanowire arrays to boost photocatalytic Cr(VI) detoxification

Jiayi Qin,<sup>a</sup> Xusheng Cao,<sup>a,b</sup> Haijun Huang,<sup>c</sup> Zhaogang Fu,<sup>d</sup> Jin-Ming Wu,<sup>b,e\*</sup> Pengfei

Zhang,<sup>a</sup> Zhi-Zhen Ye,<sup>b,e</sup> Wei Wen<sup>a\*</sup>

<sup>a</sup> College of Mechanical and Electrical Engineering, Hainan University, Haikou  
570228, China.

<sup>b</sup> Wenzhou Key Laboratory of Novel Optoelectronic and Nano Materials, Institute of  
Wenzhou, Zhejiang University, Wenzhou 325006, China.

<sup>c</sup> Zhejiang Testing & Inspection Institute for Mechanical and Electrical Products  
Quality Co., Ltd., Hangzhou 310051, China.

<sup>d</sup> Hainan Boxin Environmental Technology Co., Ltd, Haikou 571199, China.

<sup>e</sup> Shanxi-Zheda Institute of Advanced Materials and Chemical Engineering, Zhejiang  
University, Hangzhou 310027, China.

Email: [wwen@hainanu.edu.cn](mailto:wwen@hainanu.edu.cn); [msewj@zju.edu.cn](mailto:msewj@zju.edu.cn)

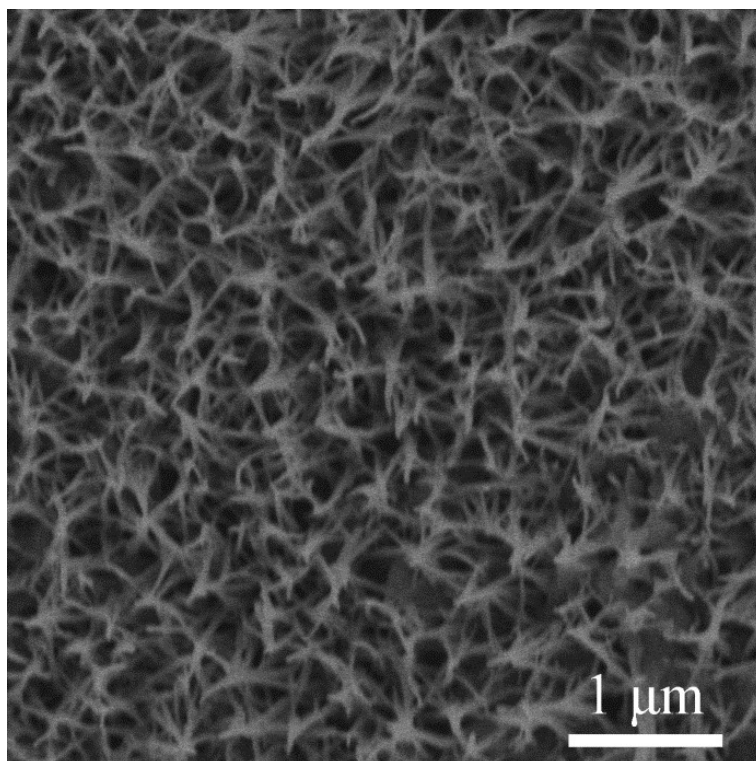

**Fig. S1** FESEM image of the titanate nanowire arrays.

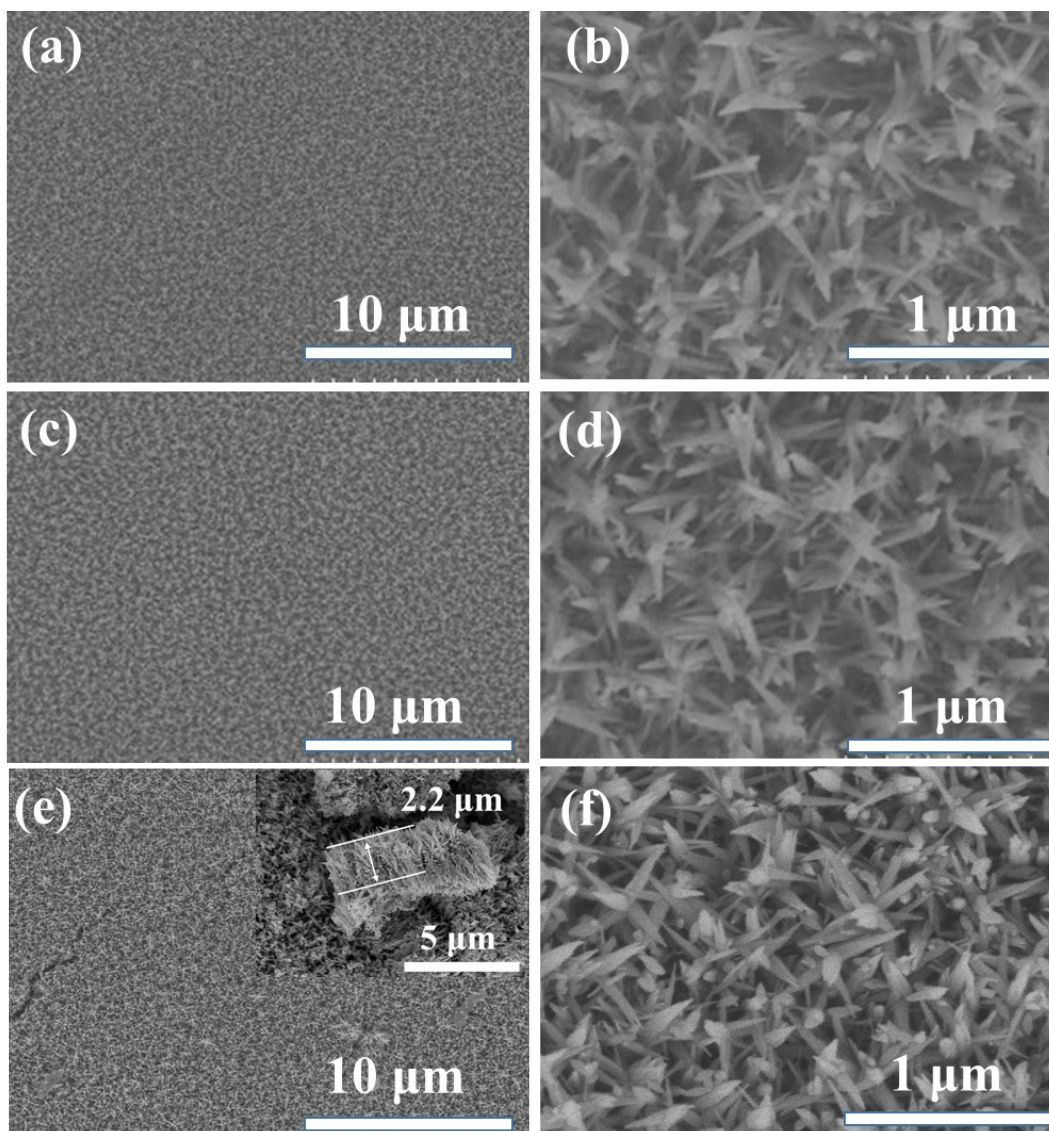

**Fig. S2** FESEM images of the NF-10 (a, b), the NF-100 (c, d), and the NF-200 (e, f).

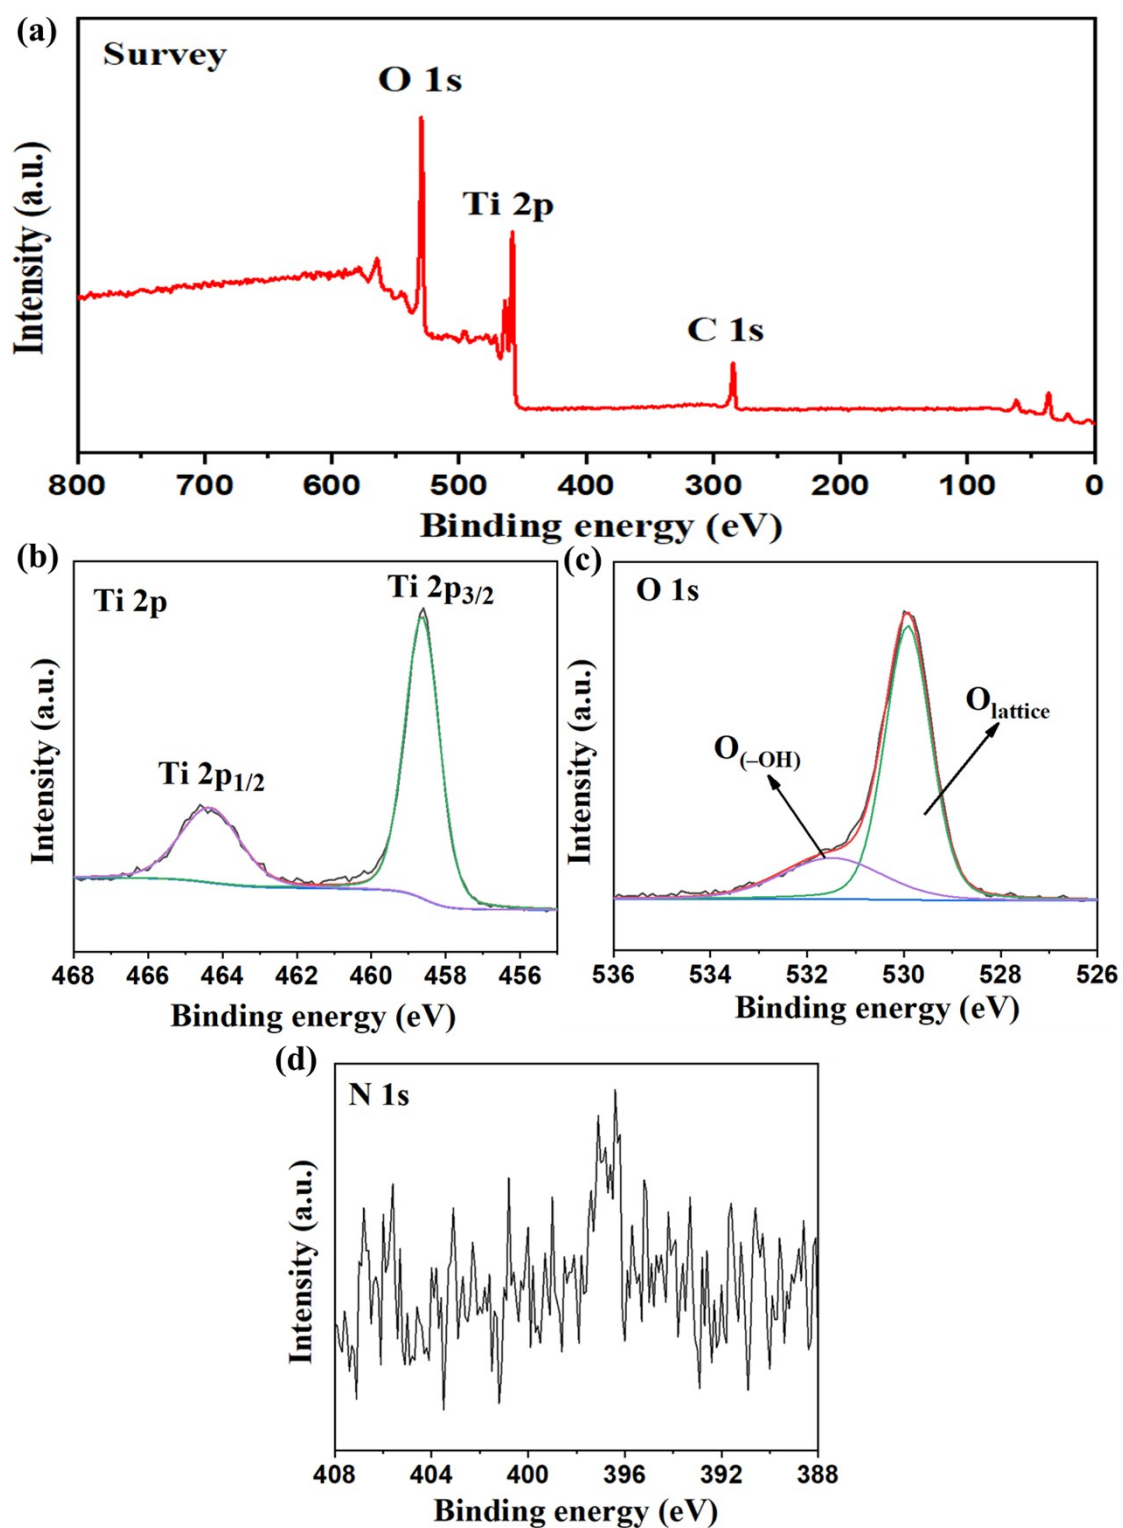

**Fig. S3** (a) Survey XPS spectrum and (b-d) High-resolution XPS spectra of Ti 2p, O 1s and N 1s for the NW.

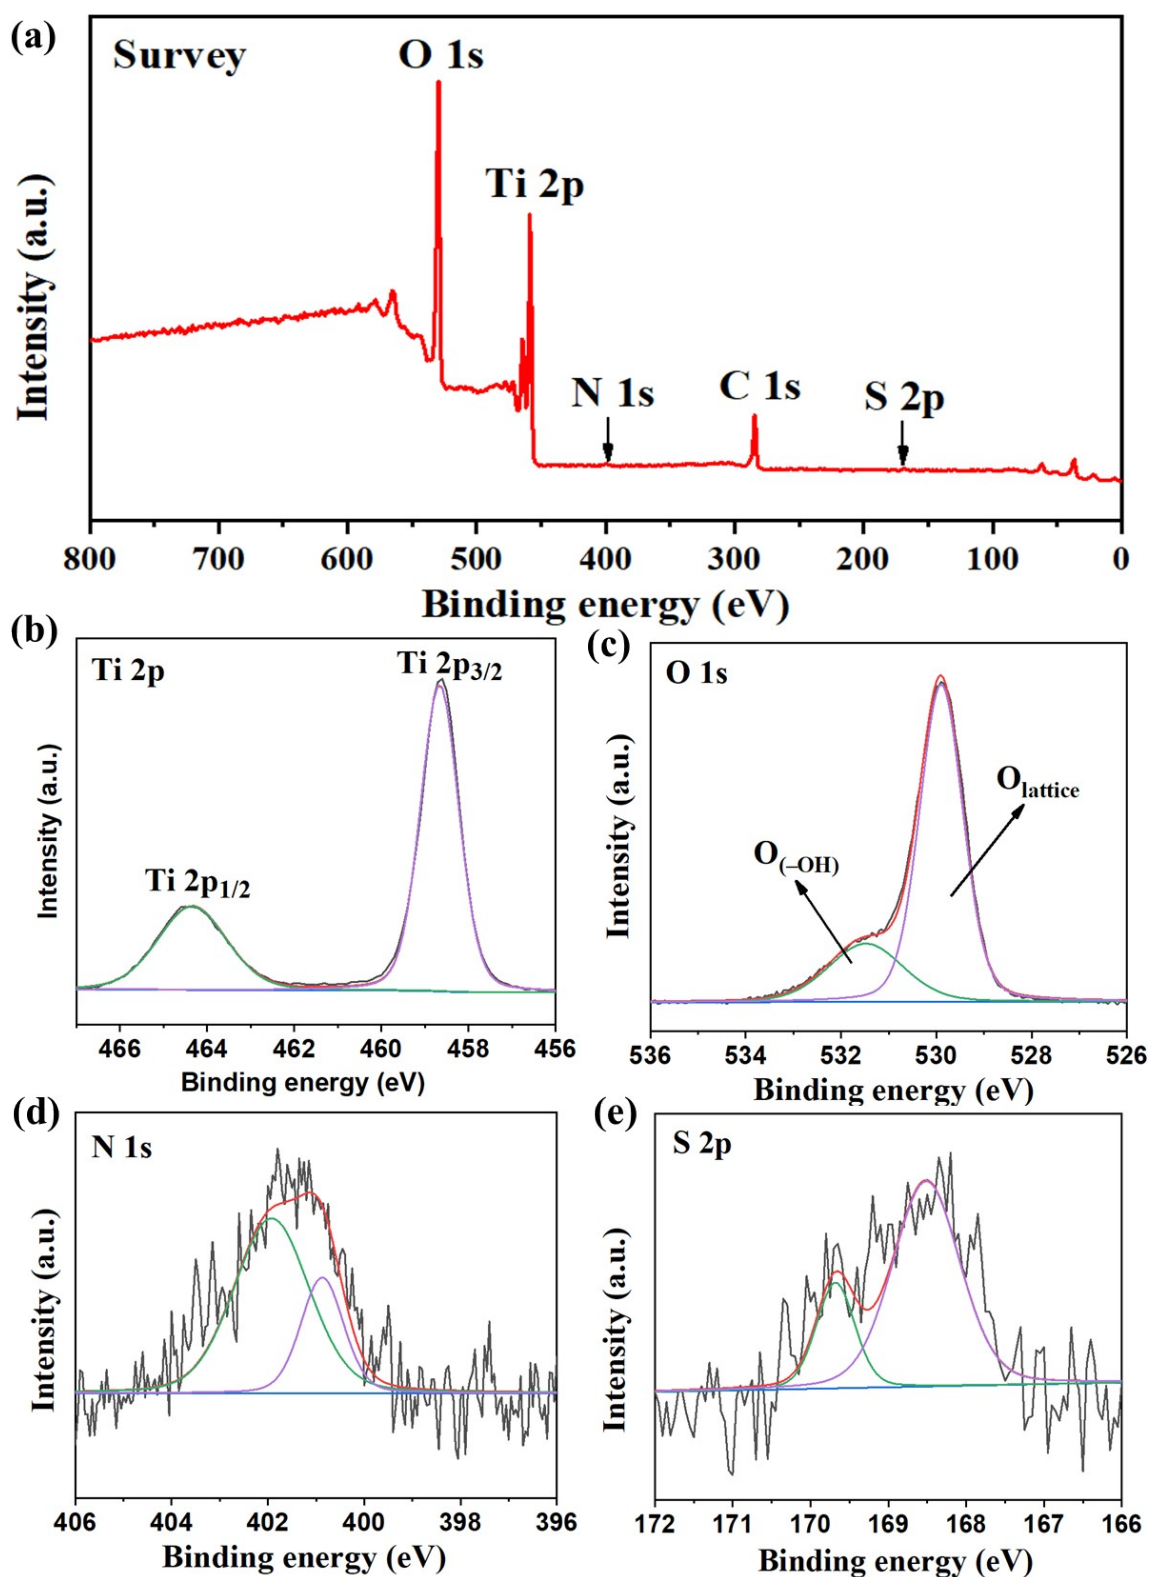

**Fig. S4** (a) Survey XPS spectrum and (b-e) High-resolution XPS spectra of Ti 2p, O 1s, N 1s, and S 2p for the NF-0.

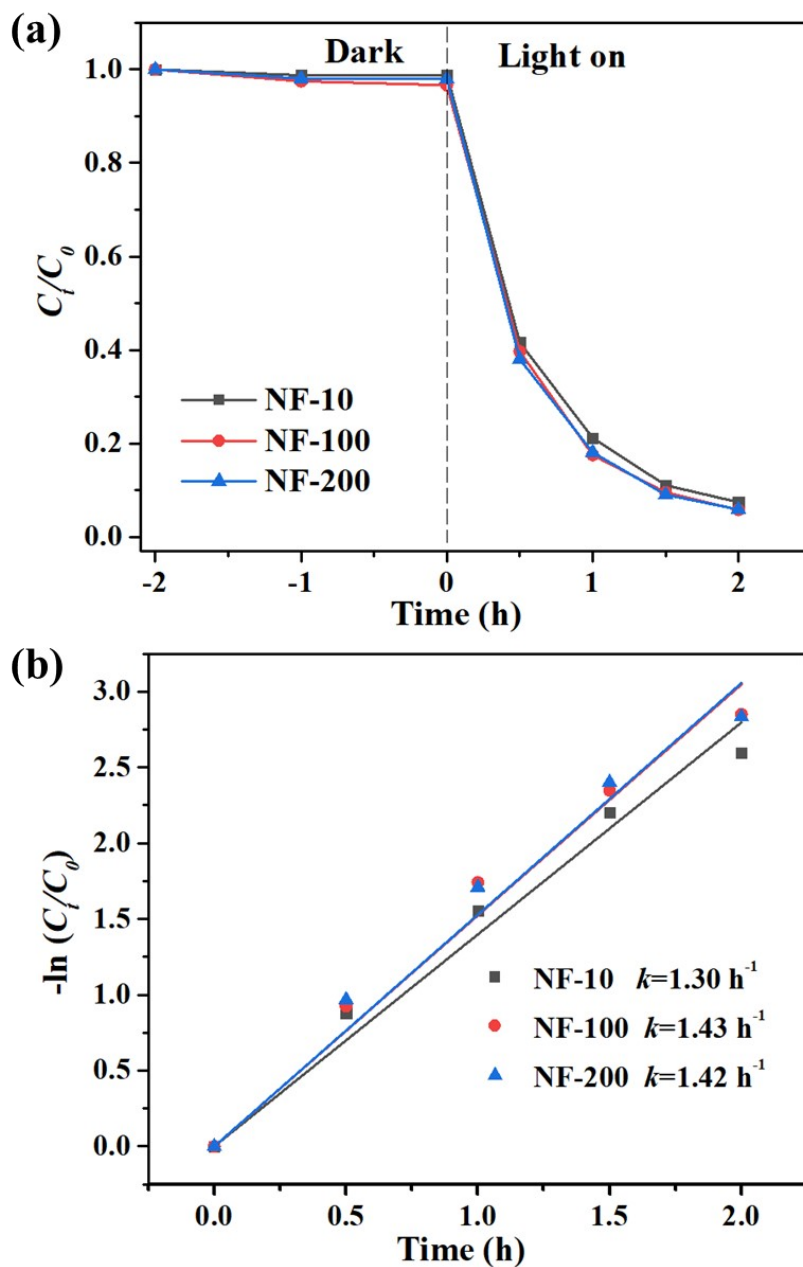

**Fig. S5** (a) The degradation curves and (b) the corresponding fitting curves assuming a pseudo-first order reaction for different catalysts of the NF-10, NF-100 and NF-200.

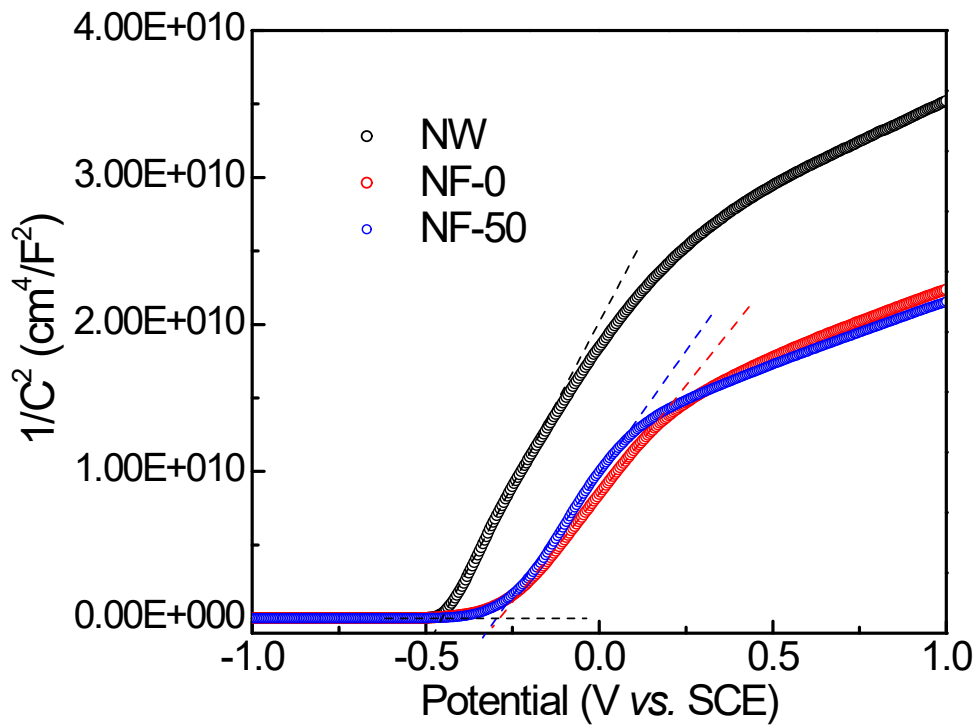

**Fig. S6** The Mott–Schottky plots of the NW, NF-0, and NF-50.
